# Supplementary material for: Inorganic layered structures in hybrid double sulfates: related phases and thermal reactivity
Source: Royal Society of Chemistry journal article supplement (doi:10.1039/c4nj02195a), 2015-01-01
Supplement: c4nj02195a1.pdf [file c4nj02195a1.pdf]

Cite this: DOI: 10.1039/c0xx00000x

www.rsc.org/xxxxxx

Advance article

## Inorganic layered structures in hybrid double sulfates: related phases and thermal reactivity

Omar KAMMOUN<sup>a,b</sup>, Walid REKIK<sup>a</sup>, Houcine NAÏLI<sup>a\*</sup> and Thierry BATAILLE<sup>b</sup>

Received (in XXX, XXX) Xth XXXXXXXXXX 20XX, Accepted Xth XXXXXXXXXX 20XX

5 DOI: 10.1039/b000000x

<sup>a</sup> Laboratoire Physicochimie de l'Etat Solide, Département de Chimie, Faculté des Sciences de Sfax, Université de Sfax, BP 1171, 3000 Sfax, Tunisie.

<sup>b</sup> Institut des Sciences Chimiques de Rennes (CNRS, UMR 6226), UEB, Université de Rennes 1, 263 avenue du Général Leclerc, F-35042 Rennes Cedex, France.

10

**Table S1.** Temperature of the dehydration and decomposition stages for  $(C_7H_7N_2)_2[M^{II}(H_2O)_6](SO_4)_2 \cdot 4H_2O$  ( $M^{II} = Zn, Cu, Ni$ )

| Thermal evolution       | ZnBZL  | CuBZL  | NiBZL  |
|-------------------------|--------|--------|--------|
| Full dehydration        | 60 °C  | 80 °C  | 90 °C  |
| Anhydrous decomposition | 240 °C | 210 °C | 200 °C |

15
